# Supplementary material for: Protonated macrocyclic Zn(ii) complexes as polyfunctional receptors for ATP
Source: Royal Society of Chemistry journal article supplement (doi:10.1039/b303264g), 2003-01-01
Supplement: b303264g.pdf [file b303264g.pdf]

## Supplementary Information

**Table S1.** Protonation constants of ligands **L1-L4** in NMe<sub>4</sub>NO<sub>3</sub> 0.1 M, 298.1 K.

| Reaction                      | <b>L1</b> | <b>L2</b> | <b>L3</b> | <b>L4</b> |
|-------------------------------|-----------|-----------|-----------|-----------|
| $L + H^+ = HL^+$              | 9.52(2)   | 9.91(3)   | 9.98(3)   | 10.39(3)  |
| $HL^+ + H^+ = H_2L^{2+}$      | 9.23(2)   | 9.43(3)   | 7.73(3)   | 9.01(2)   |
| $H_2L^{2+} + H^+ = H_3L^{3+}$ | 5.88(3)   | 6.05(3)   | 4.11(2)   | 7.35(2)   |
| $H_3L^{3+} + H^+ = H_4L^{4+}$ | 4.60(3)   | 5.22(4)   |           | 6.02(4)   |

**Table S2.** Formation constants of the ATP complexes with ligands **L1-L4** (A = ATP, L = **L1-L4**) in NMe<sub>4</sub>NO<sub>3</sub> 0.1 M, 298.1 K.

| Reaction                             | <b>L1</b> | <b>L2</b> | <b>L3</b> | <b>L4</b> |
|--------------------------------------|-----------|-----------|-----------|-----------|
| $L + 2H^+ + A^{4-} = H_2LA^{2-}$     | 23.07(5)  | 24.74(7)  | 21.95(3)  | 22.24(8)  |
| $L + 3H^+ + A^{4-} = H_3LA^-$        | 30.28(6)  | 31.18(7)  | 28.07(3)  | 30.99(2)  |
| $L + 4H^+ + A^{4-} = H_4LA$          | 36.98(3)  | 37.86(6)  | 32.53(2)  | 39.41(2)  |
| $L + 5H^+ + A^{4-} = H_5LA^+$        | 41.91(4)  | 42.49(6)  |           | 45.24(4)  |
| $L + 6H^+ + A^{4-} = H_6LA^{2+}$     |           |           |           | 47.66(5)  |
| $H_2L^{2+} + A^{4-} = H_2LA^{2-}$    | 4.32(5)   | 5.40(7)   | 4.24(3)   | 2.84(8)   |
| $H_2L^{2+} + HA^{3-} = H_3LA^-$      | 4.70(6)   | 5.01(7)   | 3.53(3)   |           |
| $H_3L^{3+} + A^{4-} = H_3LA^-$       |           |           |           | 4.24(2)   |
| $H_3L^{3+} + HA^{3-} = H_4LA$        | 5.52(3)   | 5.64(6)   | 3.88(2)   | 5.83(2)   |
| $H_4L^{4+} + HA^{3-} = H_5LA^+$      | 5.85(4)   | 5.05(6)   |           | 5.64(4)   |
| $H_4L^{4+} + H_2A^{2-} = H_6LA^{2+}$ |           |           |           | 4.03(5)   |

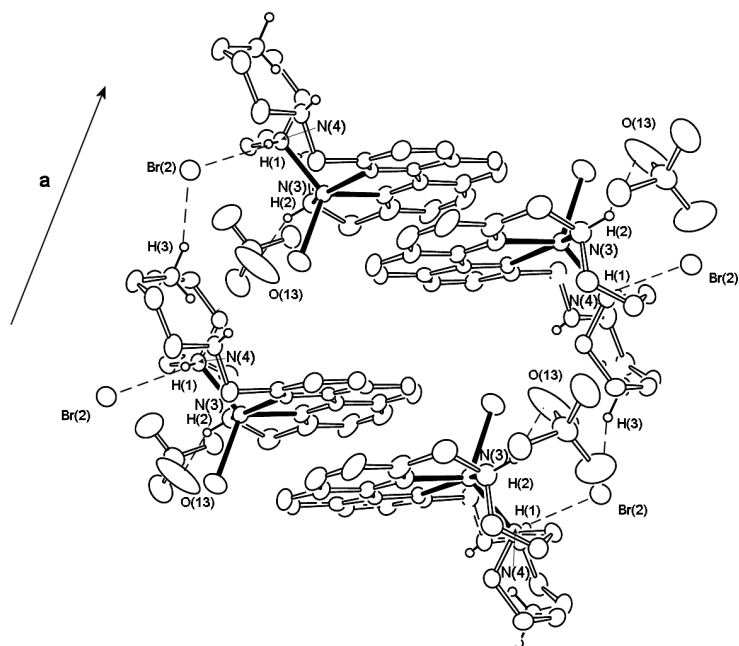

**Figure S1.** Crystal packing of the  $[\text{ZnHL4Br}]\text{Br}(\text{ClO}_4)$  complex, displaying the pillared structure of  $[\text{ZnHL4Br}]^+$  cations, associated *via* hydrogen bonds with the Br(2) anion and  $\pi$ -stacking interactions between the phenanthroline moieties
